# Supplementary material for: Penetrance and Pleiotropy of Polygenic Risk Scores for Schizophrenia in 106,160 Patients Across Four Health Care Systems
Source: Atypon-hosted journal article supplement (doi:10.1176/appi.ajp.2019.18091085), 2019-08-16

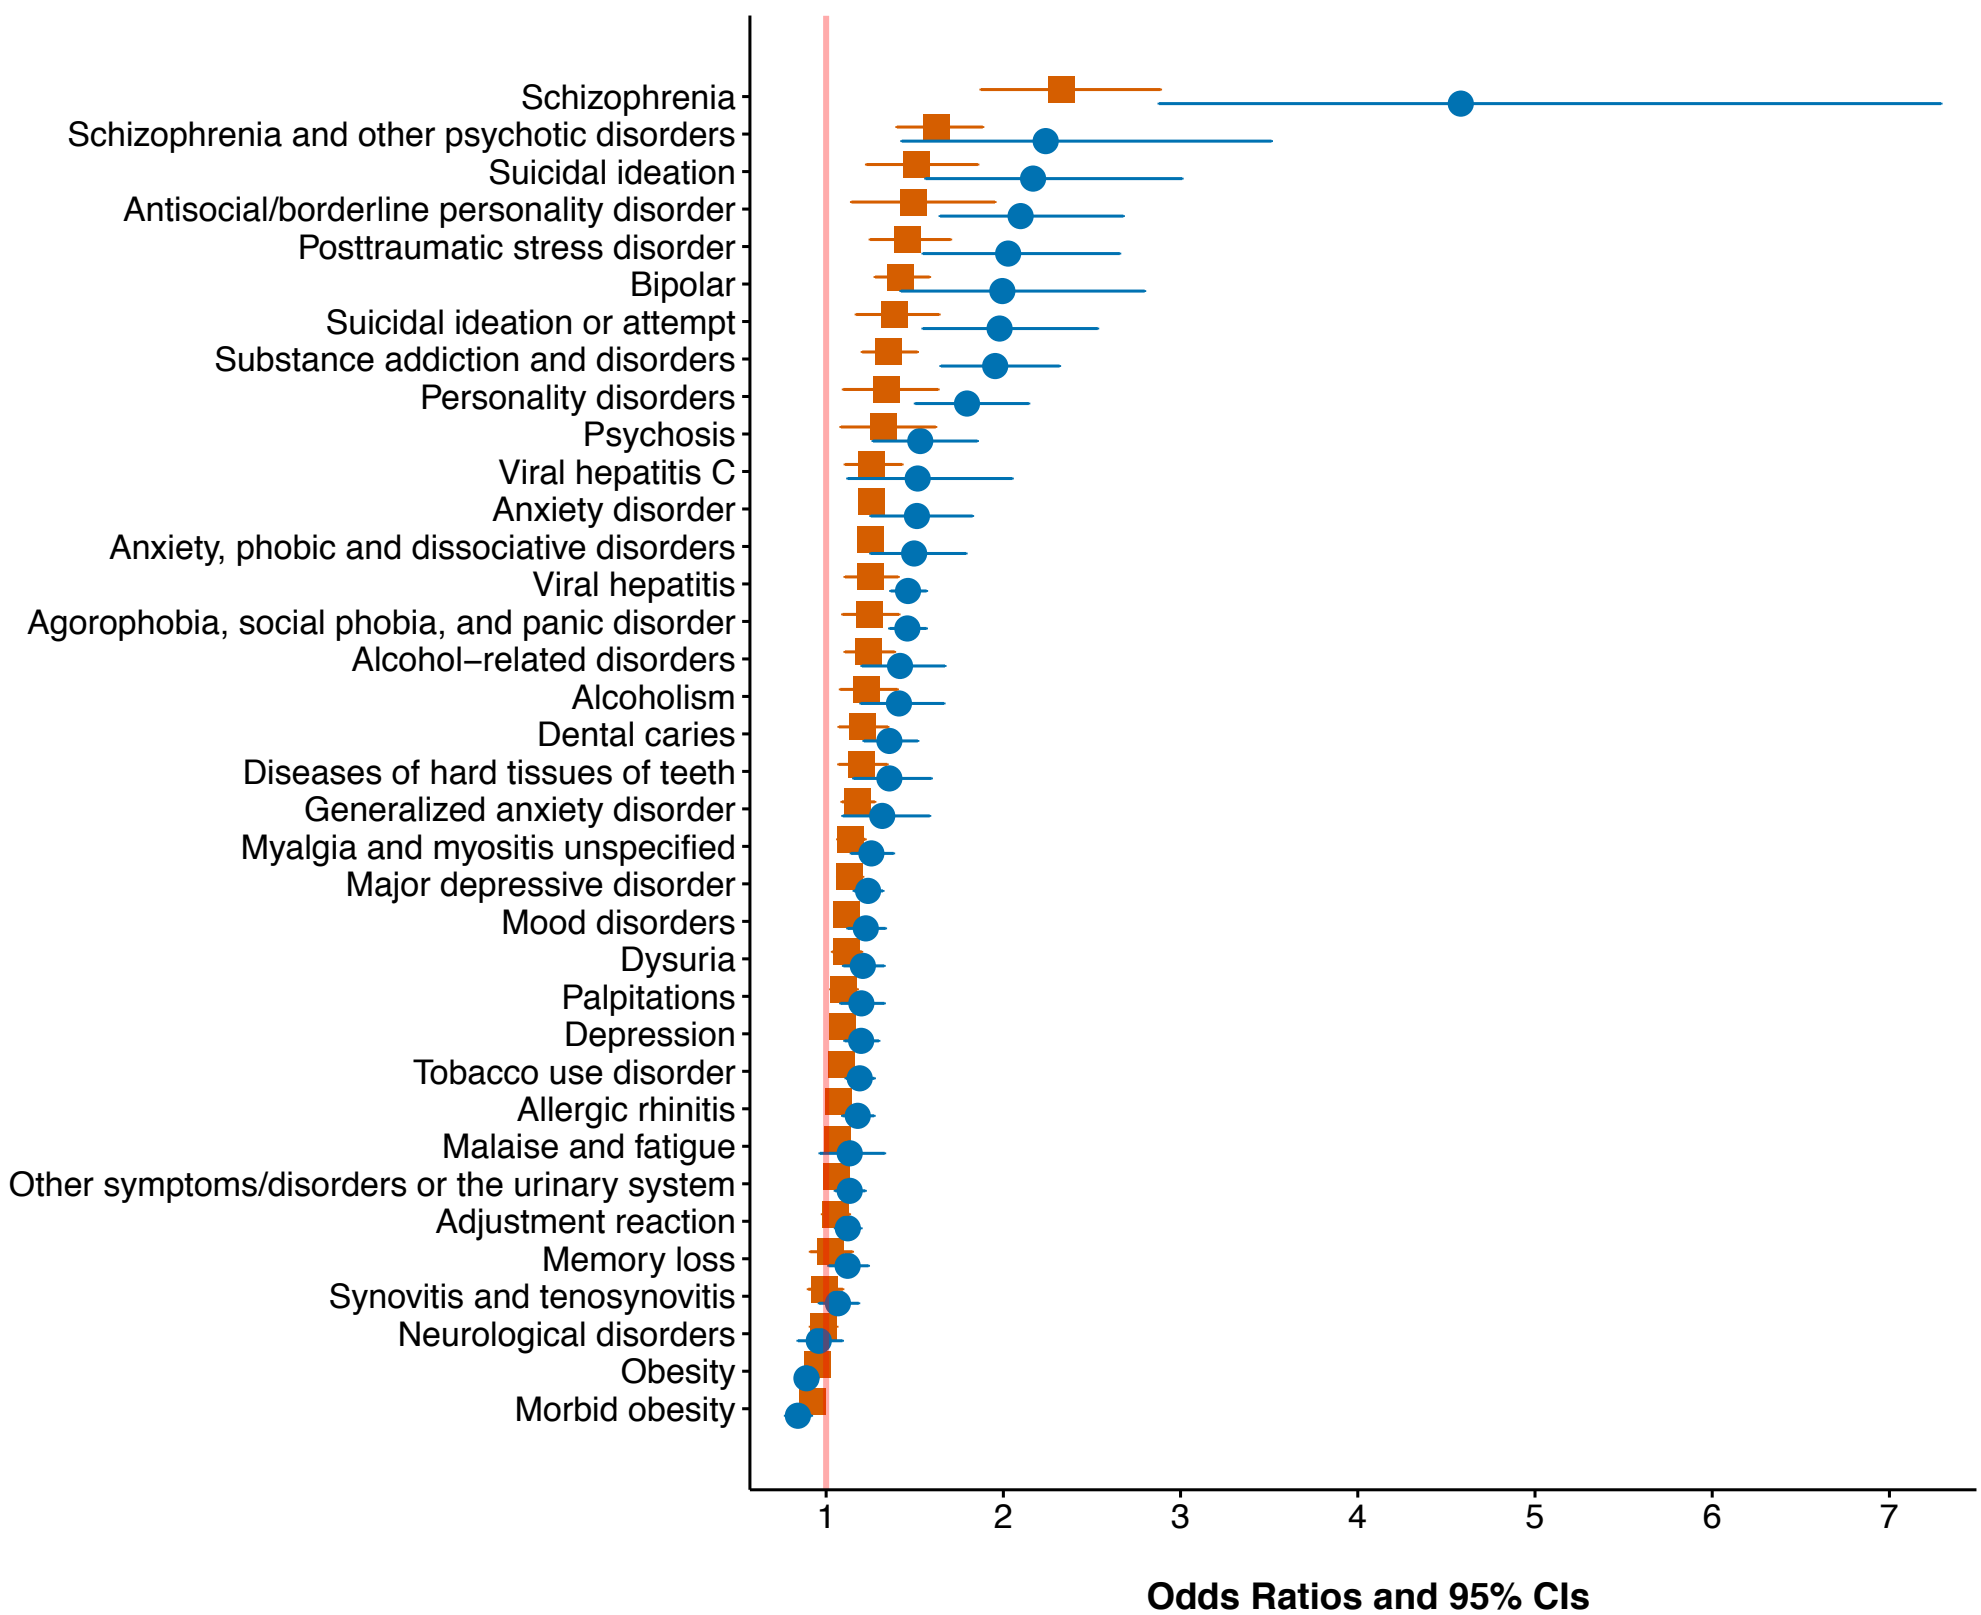

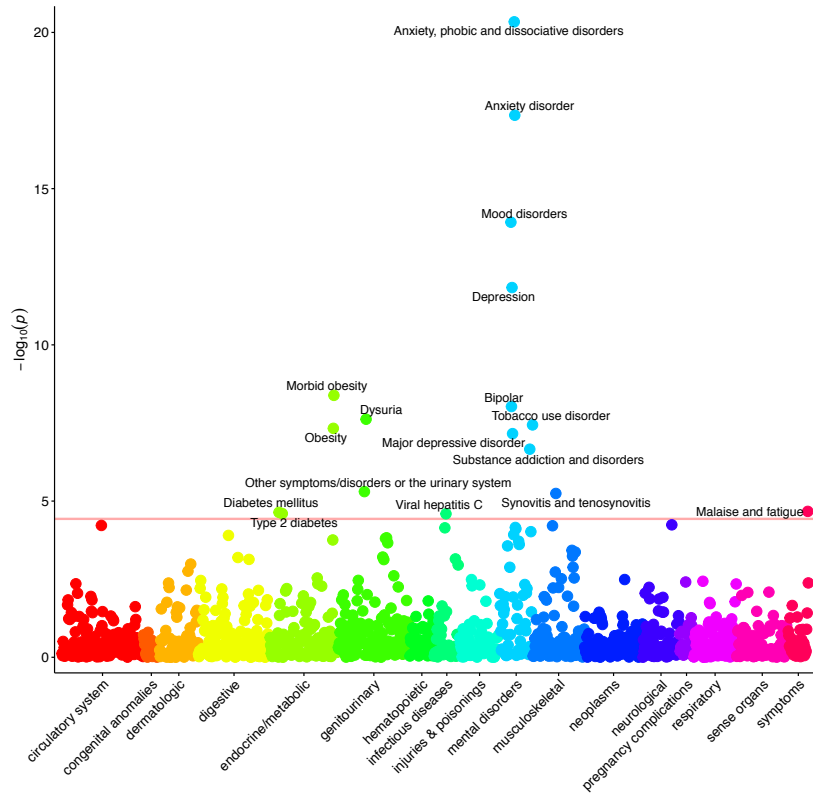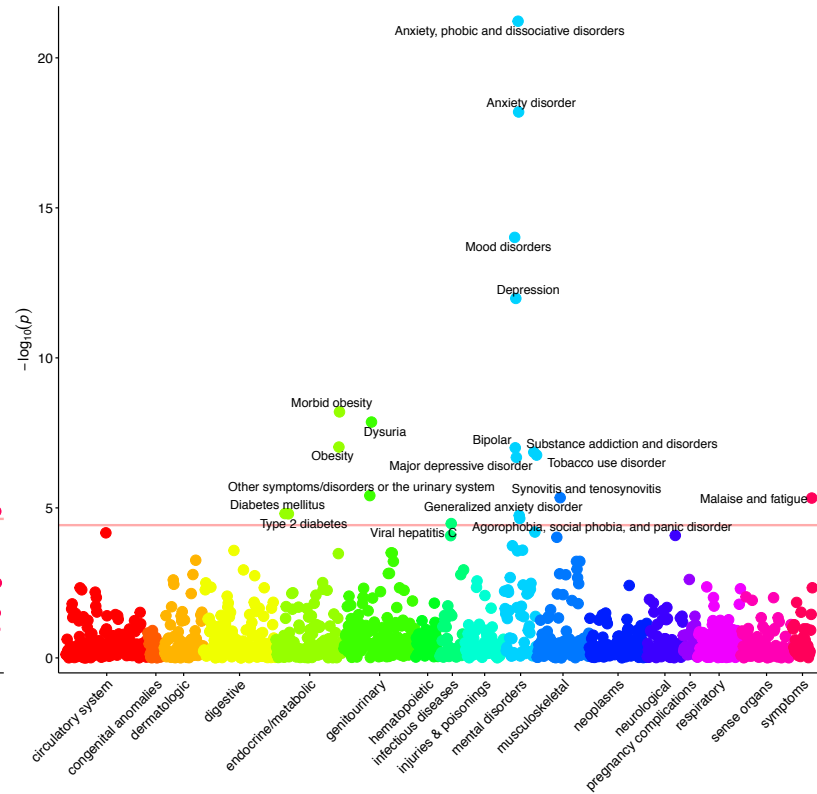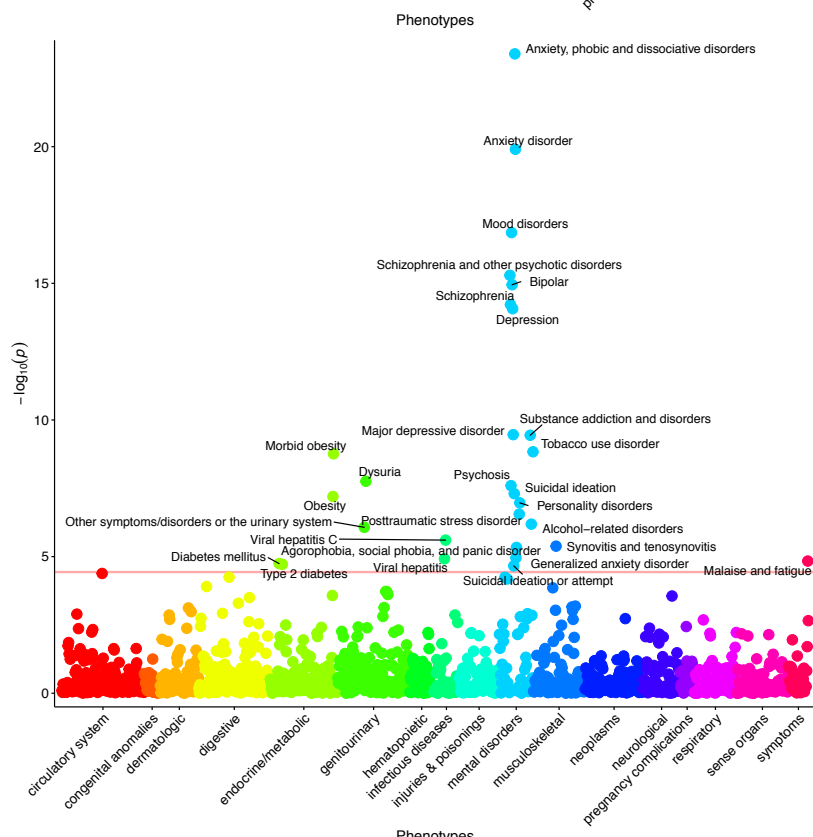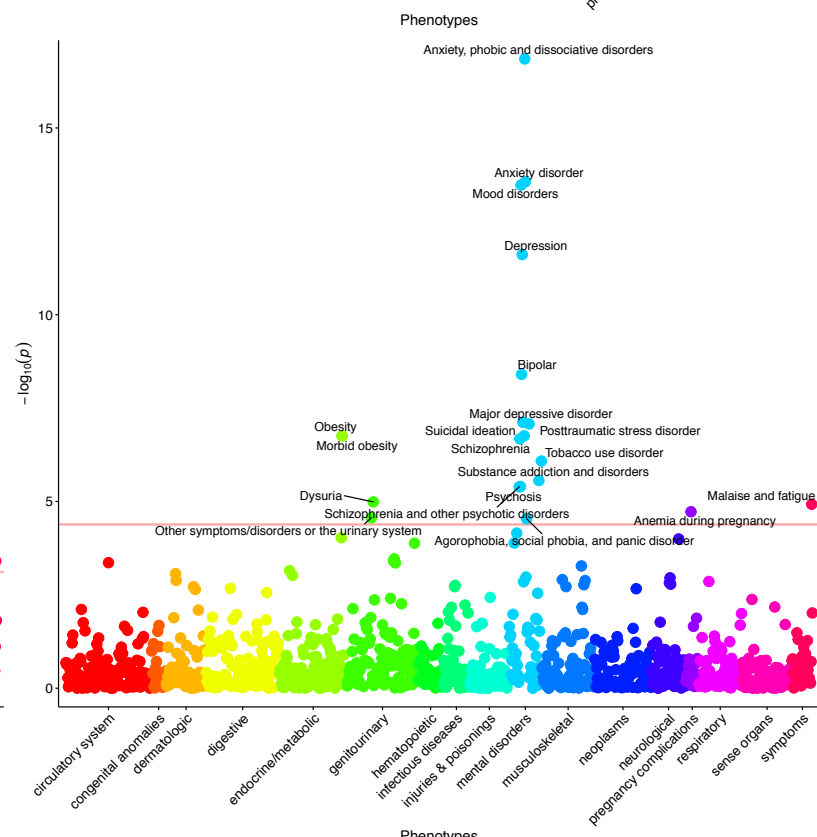

Supplement: AJP_18091085_ds003_SupplementaryFigures.pdf [file AJP_18091085_ds003_SupplementaryFigures.pdf]
